# Supplementary material for: Independent effects of dietary fat and sucrose content on chondrocyte metabolism and osteoarthritis pathology in mice
Source: PubMed Central journal article supplement (PMC6176996; doi:10.1242/dmm.034827), 2018-08-31
Supplement: dmm-11-034827-s1.pdf [file dmm-11-034827-s1.pdf]

### A. Serum Metabolic Biomarkers

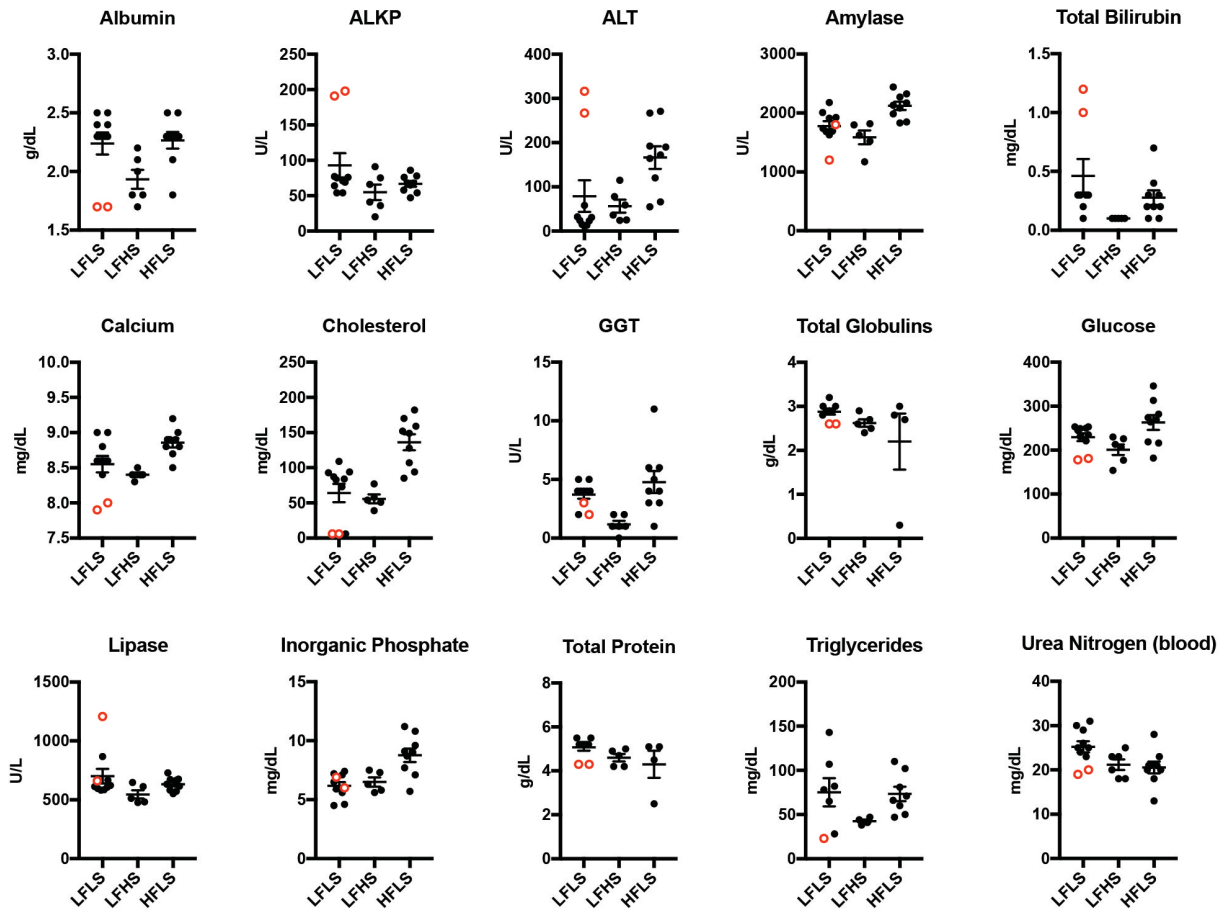

### B. Synovial Pathology

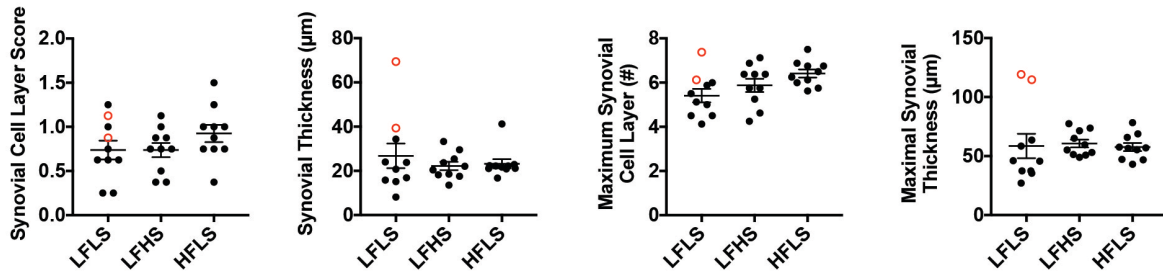

**Figure S1: Metabolic and synovial results highlighting excluded outlier data.** We observed tumor-like liver nodules during tissue harvest in two LFLS animals (red open circles). A. Metabolic biomarker data from affected animals were identified as outliers based on a ROUT outlier analysis (Q=5%) for Albumin, ALKP, ALT, Total Bilirubin, Glucose, and Lipase (one sample). These results are consistent with impaired liver function; therefore, the data for these animals were excluded from all the metabolic panels. B. Affected animals also showed increased synovial thickness and cellularity, although cartilage and osteophyte results were not altered (data not shown). Thus, only synovial data were excluded from these animals. The time course of liver disease onset in these animals is not known.

### A. Regions of evaluation and terminology definitions

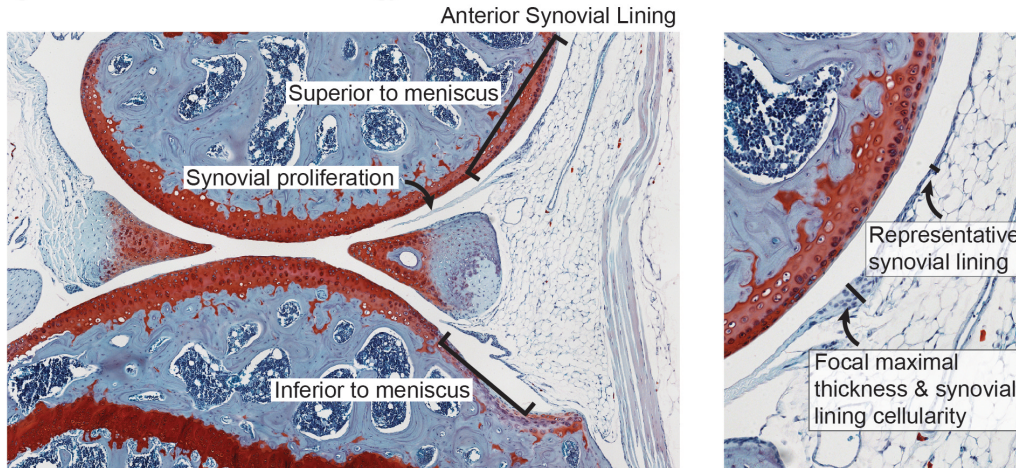

### B. Evaluation categories

- 1) Synovial lining cell layer enlargement (representative region); semi-quantitative scoring (0-3) (see Table S2)
- 2) Synovial lining thickness (representative region) ( $\mu\text{m}$ )
- 3) Synovial proliferation into cartilage articulating surfaces (anterior region) (0=absent, 1=present)
- 4) Maximal focal synovial lining cell number (per evaluation region) (# of cells)
- 5) Maximal focal synovial lining thickness (per evaluation region) ( $\mu\text{m}$ )

### C. Summary of diet treatment results

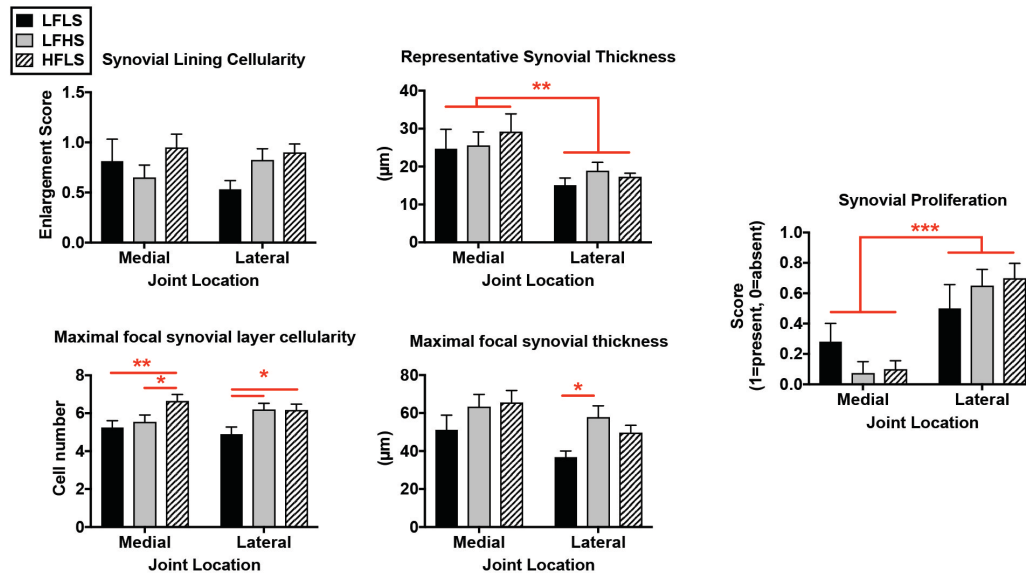

**Figure S2: Synovial histopathology assessment and location-specific results.** A. The synovium was evaluated for lining layer cellularity and thickening in the joint region superior and inferior to the anterior horn of the meniscus. Due to occasional thickened synovium adjacent to the meniscus, focal maximal values were recorded separately from more distal uniform regions (i.e., representative regions). B. All data were collected in a blinded fashion from medial and lateral compartments (2 sections each). Replicate data averaged to generate one value per animal. C. Bars are mean $\pm$ s.e.m. Lines over bars indicate significant differences (\* $P$ <0.05, \*\* $P$ <0.01, \*\*\* $P$ <0.001) by Kruskal-Wallis or repeated-measures two-way ANOVA with FDR-corrected post-hoc tests (0.05).  $n$ =8 LFLS,  $n$ =10 LFHS,  $n$ =10 HFLS.

**Table S1. Composition of Diets**

|                          | <b>LFLS</b>    |             | <b>LFHS</b>    |             | <b>HFLS</b>   |             |
|--------------------------|----------------|-------------|----------------|-------------|---------------|-------------|
| Research Diets, Inc.     | #D12450J       |             | #D12450B       |             | #D12492       |             |
|                          | gram%          | kcal%       | gram%          | kcal%       | gram%         | kcal%       |
| Protein                  | 19.2           | 20          | 19.2           | 20          | 26            | 20          |
| Carbohydrate             | 67.3           | 70          | 67.3           | 70          | 26            | 20          |
| Fat                      | 4.3            | 10          | 4.3            | 10          | 35            | 60          |
| Total                    |                | 100         |                | 100         |               |             |
| kcal/gm                  | 3.85           |             | 3.85           |             | 5.24          |             |
| <b>Ingredient</b>        | <b>gram</b>    | <b>kcal</b> | <b>gram</b>    | <b>kcal</b> | <b>gram</b>   | <b>kcal</b> |
| Casein, 30 Mesh          | 200            | 800         | 200            | 800         | 200           | 800         |
| L-Cystine                | 3              | 12          | 3              | 12          | 3             | 12          |
| Corn Starch              | 506            | 2025        | 315            | 1260        | 0             | 0           |
| Maltodextrin 10          | 125            | 500         | 35             | 140         | 125           | 500         |
| Sucrose                  | 68.8           | 275         | 350            | 1400        | 68.8          | 275         |
| Cellulose, BW200         | 50             | 0           | 50             | 0           | 50            | 0           |
| Soybean Oil              | 25             | 225         | 25             | 225         | 25            | 225         |
| Lard                     | 20             | 180         | 20             | 180         | 245           | 2205        |
| Mineral Mix S10026       | 10             | 0           | 10             | 0           | 10            | 0           |
| DiCalcium Phosphate      | 13             | 0           | 13             | 0           | 13            | 0           |
| Calcium Carbonate        | 5.5            | 0           | 5.5            | 0           | 5.5           | 0           |
| Potassium Citrate, 1 H2O | 16.5           | 0           | 16.5           | 0           | 16.5          | 0           |
| Vitamin Mix V10001       | 10             | 40          | 10             | 40          | 10            | 40          |
| Choline Bitartrate       | 2              | 0           | 2              | 0           | 2             | 0           |
| FD&C Yellow Dye #5       | 0.04           | 0           | 0.05           | 0           | 0             | 0           |
| FD&C Red Dye #40         | 0              | 0           | 0              | 0           | 0             | 0           |
| FD&C Blue Dye #1         | 0.01           | 0           | 0              | 0           | 0.05          | 0           |
| <b>Total</b>             | <b>1055.05</b> | <b>4057</b> | <b>1055.05</b> | <b>4057</b> | <b>773.85</b> | <b>4057</b> |

**Table S2. OA Histopathology Scoring Criteria**

| OARSI cartilage OA pathology for mouse knee joints (Glasson et al., 2010) |                                                                                                           |
|---------------------------------------------------------------------------|-----------------------------------------------------------------------------------------------------------|
| Grade                                                                     | Description                                                                                               |
| 0                                                                         | Normal                                                                                                    |
| 0.5                                                                       | Loss of Safranin-O without structural changes                                                             |
| 1                                                                         | Small fibrillations without loss of cartilage                                                             |
| 2                                                                         | Vertical clefts down to the layer immediately below the superficial layer and some loss of surface lamina |
| 3                                                                         | Vertical clefts/erosion to the calcified cartilage extending to <25% of the articular surface             |
| 4                                                                         | Vertical clefts/erosion to the calcified cartilage extending to 25% - 50% of the articular surface        |
| 5                                                                         | Vertical clefts/erosion to the calcified cartilage extending to 50% - 75% of the articular surface        |
| 6                                                                         | Vertical clefts/erosion to the calcified cartilage extending >75% of the articular surface                |

| Modified Mankin cartilage OA pathology for mouse knee joints (Furman et al. 2007)    |                                                                                                                     |                                                                                                                                        |
|--------------------------------------------------------------------------------------|---------------------------------------------------------------------------------------------------------------------|----------------------------------------------------------------------------------------------------------------------------------------|
| Parameter                                                                            | Grade                                                                                                               | Description                                                                                                                            |
| <b>Articular Cartilage Structure</b>                                                 | 0                                                                                                                   | Normal                                                                                                                                 |
|                                                                                      | 1                                                                                                                   | Undulating articular surface, but no fibrillation                                                                                      |
|                                                                                      | 2                                                                                                                   | Mild superficial fibrillation involving < half of plateau/condyle                                                                      |
|                                                                                      | 3                                                                                                                   | Mild superficial fibrillation involving ≥ half of plateau/condyle                                                                      |
|                                                                                      | 4                                                                                                                   | Mild fibrillation/clefts/loss involving up to 1/3 depth of noncalcified articular cartilage thickness in < half of plateau/condyle     |
|                                                                                      | 5                                                                                                                   | Mild fibrillation/clefts/loss involving up to 1/3 depth of noncalcified articular cartilage thickness in ≥ half of plateau/condyle     |
|                                                                                      | 6                                                                                                                   | Moderate fibrillation/clefts/loss involving up to 2/3 depth of noncalcified articular cartilage thickness in < half of plateau/condyle |
|                                                                                      | 7                                                                                                                   | Moderate fibrillation/clefts/loss involving up to 2/3 depth of noncalcified articular cartilage thickness in ≥ half of plateau/condyle |
|                                                                                      | 8                                                                                                                   | Severe fibrillation/clefts/loss involving > 2/3 depth of noncalcified articular cartilage thickness in < half of plateau/condyle       |
|                                                                                      | 9                                                                                                                   | Severe fibrillation/clefts/loss involving > 2/3 depth of noncalcified articular cartilage thickness in ≥ half of plateau/condyle       |
|                                                                                      | 10                                                                                                                  | Clefts/loss of articular cartilage through tidemark                                                                                    |
| 11                                                                                   | Clefts/loss of articular cartilage through to subchondral bone                                                      |                                                                                                                                        |
| <b>Tidemark duplication</b>                                                          | 0                                                                                                                   | none (only one tidemark)                                                                                                               |
|                                                                                      | 1                                                                                                                   | 2 tidemarks                                                                                                                            |
|                                                                                      | 2                                                                                                                   | >2 tidemarks                                                                                                                           |
|                                                                                      | 3                                                                                                                   | no visible tidemark remaining                                                                                                          |
| <b>Safranin-O staining*</b><br>*loss of cartilage treated as severe loss of staining | 0                                                                                                                   | Normal (no loss of staining in non-calcified cartilage)                                                                                |
|                                                                                      | 1                                                                                                                   | Moderate loss of staining in up to 1/2 depth of noncalcified cartilage thickness and involving < half of plateau/condyle               |
|                                                                                      | 2                                                                                                                   | Moderate loss of staining up to 1/2 depth of noncalcified cartilage thickness and involving ≥ half of plateau/condyle                  |
|                                                                                      | 3                                                                                                                   | Moderate loss of staining in > 1/2 depth of noncalcified cartilage thickness and involving < half of plateau/condyle                   |
|                                                                                      | 4                                                                                                                   | Moderate loss of staining in > 1/2 depth of noncalcified cartilage thickness and involving ≥ half of plateau/condyle                   |
|                                                                                      | 5                                                                                                                   | Severe loss of staining up to 1/2 depth of noncalcified cartilage thickness and involving < half of plateau/condyle                    |
|                                                                                      | 6                                                                                                                   | Severe loss of staining up to 1/2 depth of noncalcified cartilage thickness and involving ≥ half of plateau/condyle                    |
|                                                                                      | 7                                                                                                                   | Severe loss of staining in > 1/2 depth of noncalcified cartilage thickness and involving < half of plateau/condyle                     |
| 8                                                                                    | Severe loss of staining in > 1/2 depth of non-calcified cartilage thickness and involving ≥ half of plateau/condyle |                                                                                                                                        |
| <b>Calcified cartilage</b>                                                           | 0                                                                                                                   | 0-5 hypertrophic chondrocytes                                                                                                          |
|                                                                                      | 1                                                                                                                   | 6-10 hypertrophic chondrocytes                                                                                                         |
|                                                                                      | 2                                                                                                                   | >10 hypertrophic chondrocytes                                                                                                          |

| Osteophyte severity (Kraus et al. 2010) |                                                                                                                                   |
|-----------------------------------------|-----------------------------------------------------------------------------------------------------------------------------------|
| Grade                                   | Description                                                                                                                       |
| 0                                       | Normal                                                                                                                            |
| 1                                       | Slight protrusion resulting in a right-angle between articular surface and the lateral/medial tibial condyle                      |
| 2                                       | Clear protrusion of the lateral/medial tibial condyle                                                                             |
| 3                                       | Severe protrusion of lateral/medial condyle resulting in an inferior-oriented capsular attachment surface (e.g., "bucket handle") |

| Synovial lining cell layer enlargement (modified from Lewis et al. 2011) |                     |
|--------------------------------------------------------------------------|---------------------|
| Grade                                                                    | Description         |
| 0                                                                        | Thickness 1-2 cells |
| 1                                                                        | Thickness 2-4 cells |
| 2                                                                        | Thickness 4-6 cells |
| 3                                                                        | Thickness ≥7 cells  |

Glasson, S. S., Chambers, M. G., van den Berg, W. B., & Little, C. B. (2010). The OARSI histopathology initiative - recommendations for histological assessments of osteoarthritis in the mouse. *Osteoarthritis and Cartilage*, 18(S3), S17-S23.

Furman, B. D., Strand, J., Hembree, W. C., Ward, B. D., Guilak, F., & Olson, S. A. (2007). Joint degeneration following closed intraarticular fracture in the mouse knee: A model of posttraumatic arthritis. *Journal of Orthopaedic Research*, 25(5), 578-592.

Kraus, V. B., Huebner, J. L., DeGroot, J., & Bendele, A. (2010). The OARSI histopathology initiative - recommendations for histological assessments of osteoarthritis in the guinea pig. *Osteoarthritis Cartilage*, 18(S3), S35-S52.

Lewis, J. S., Hembree, W. C., Furman, B. D., Tippetts, L., Cattel, D., Huebner, J. L., et al. (2011). Acute joint pathology and synovial inflammation is associated with increased intra-articular fracture severity in the mouse knee. *Osteoarthritis and Cartilage / OARS, Osteoarthritis Research Society*, 19(7), 864-873.

**Table S3. Diet-specific effects on cartilage gene expression**

| Gene name       | NCBI Ref. Seq. | LFLS             | LFHS              | HFLS              | P-value  |
|-----------------|----------------|------------------|-------------------|-------------------|----------|
| <i>Acc</i>      | NM_133360      | 0.013±0.0095     | 0.0079±0.0012     | 0.0074±0.00068    | NS       |
| <i>Adamts5</i>  | NM_011782      | 0.0095±0.0040    | 0.0088±0.0021     | 0.010±0.0044      | NS       |
| <i>Acan</i>     | NM_007424      | 0.070±0.046      | 0.066±0.021       | 0.082±0.034       | NS       |
| <i>Prkaa1</i>   | NM_001013367   | 0.015±0.0032     | 0.012±0.0018      | 0.013±0.0017      | NS       |
| <i>Bcl2</i>     | NM_009741      | 0.0073±0.0032    | 0.0049±0.0014     | 0.0064±0.0023     | NS       |
| <i>Casp1</i>    | NM_009807      | 0.019±0.0059     | 0.016±0.0019      | 0.019±0.0035      | NS       |
| <i>Ddit3</i>    | NM_007837      | 0.024±0.0040a    | 0.014±0.0033b     | 0.015±0.0051b     | p<0.0001 |
| <i>Clpp</i>     | NM_017393      | 0.00032±0.00015a | 0.00014±4.6e-005b | 0.00016±4.5e-005b | p=0.0012 |
| <i>Clpx</i>     | NM_011802      | 0.024±0.0058a    | 0.017±0.0036b     | 0.020±0.0031a,b   | p=0.0320 |
| <i>Col10a1</i>  | NM_009925      | 0.21±0.17        | 0.13±0.057        | 0.17±0.089        | NS       |
| <i>Col2a1</i>   | NM_031163      | 0.18±0.11        | 0.22±0.18         | 0.18±0.079        | NS       |
| <i>Ptgs2</i>    | NM_011198      | 0.00086±0.00050  | 0.0011±0.00065    | 0.00080±0.00039   | NS       |
| <i>Cpt1a</i>    | NM_001876      | 0.013±0.0021a    | 0.013±0.0049a     | 0.019±0.0026b     | p=0.0023 |
| <i>Esrra</i>    | NM_007953      | 0.0033±0.0017    | 0.0030±0.00068    | 0.0037±0.0014     | NS       |
| <i>Foxo3</i>    | NM_019740      | 0.086±0.011a     | 0.049±0.015b      | 0.062±0.017b      | p=0.0002 |
| <i>Hif1a</i>    | NM_010431      | 0.029±0.011      | 0.029±0.0066      | 0.031±0.0063      | NS       |
| <i>Epas1</i>    | NM_010137      | 0.032±0.011      | 0.023±0.0035      | 0.029±0.011       | NS       |
| <i>Hsp10</i>    | NM_008303      | 0.058±0.011a     | 0.041±0.0080b     | 0.039±0.0094b     | p=0.0014 |
| <i>Hspd1</i>    | NM_010477      | 0.039±0.0037     | 0.034±0.0069      | 0.032±0.0083      | NS       |
| <i>Hspa1b</i>   | NM_010478      | 0.0089±0.0054    | 0.0087±0.0057     | 0.0053±0.0035     | NS       |
| <i>Hsp90</i>    | NM_010480      | 0.33±0.035a      | 0.27±0.054a,b     | 0.25±0.073b       | p=0.0308 |
| <i>Idh2</i>     | NM_173011      | 0.035±0.0095     | 0.028±0.0044      | 0.032±0.0057      | NS       |
| <i>Map1lc3a</i> | NM_025735      | 0.013±0.0060     | 0.012±0.0046      | 0.013±0.0033      | NS       |
| <i>Acadl</i>    | NM_007381      | 0.069±0.018      | 0.058±0.0085      | 0.059±0.011       | NS       |
| <i>Lonp1</i>    | NM_028782      | 0.013±0.0032a    | 0.011±0.0013b     | 0.012±0.0017a,b   | p=0.0148 |
| <i>Mmp13</i>    | NM_008607      | 0.11±0.041       | 0.11±0.071        | 0.11±0.064        | NS       |
| <i>Mmp9</i>     | NM_013599      | 0.39±0.10        | 0.43±0.11         | 0.41±0.097        | NS       |
| <i>Pmpca</i>    | NM_173180      | 0.010±0.0032     | 0.0094±0.0012     | 0.0099±0.0010     | NS       |
| <i>Mtif2</i>    | NM_133767      | 0.011±0.0019a    | 0.0083±0.0015b    | 0.0094±0.0016a,b  | p=0.0197 |
| <i>Nampt</i>    | NM_021524      | 0.037±0.0092     | 0.032±0.0027      | 0.036±0.0068      | NS       |
| <i>Nfkb1</i>    | NM_008689      | 0.038±0.0091     | 0.031±0.0067      | 0.034±0.0054      | NS       |
| <i>Nos2</i>     | NM_010927      | 0.00013±6.0e-005 | 0.00021±0.00023   | 0.00013±0.00012   | NS       |
| <i>Nox4</i>     | NM_015760      | 0.0027±0.0027    | 0.0021±0.0013     | 0.0018±0.0018     | NS       |
| <i>Pdk4</i>     | NM_013743      | 0.0094±0.0089    | 0.0078±0.0061     | 0.0074±0.0033     | NS       |
| <i>Pfkm</i>     | NM_021514      | 0.051±0.042      | 0.044±0.040       | 0.022±0.012       | NS       |
| <i>Ppargc1a</i> | NM_008904      | 0.00044±0.00035  | 0.00030±0.00021   | 0.00020±0.00011   | NS       |
| <i>Rela</i>     | NM_009045      | 0.0084±0.0021    | 0.0074±0.0017     | 0.0082±0.0014     | NS       |
| <i>Sirt1</i>    | NM_019812      | 0.022±0.0051     | 0.016±0.0042      | 0.020±0.0044      | NS       |
| <i>Sirt3</i>    | NM_022433      | 0.0079±0.0021    | 0.0066±0.0016     | 0.0070±0.0014     | NS       |
| <i>Sod1</i>     | NM_011434      | 0.12±0.023a      | 0.072±0.020b      | 0.085±0.031b      | p=0.0010 |
| <i>Sod2</i>     | NM_013671      | 0.051±0.024a     | 0.030±0.011b      | 0.029±0.011b      | p=0.0186 |
| <i>Xbp1</i>     | NM_013842      | 0.075±0.029      | 0.063±0.018       | 0.059±0.026       | NS       |

Gene expression ( $2^{-\Delta\Delta Ct}$ ) of cartilage harvested from mice fed a LFLS (low fat/low sucrose), LFHS (low fat/high sucrose), or HFSL (high fat/low sucrose) diet was measured using quantitative PCR. Results were compared among the three diet groups ( $n=8$  per diet). Data were log-transformed for one-way ANOVA testing or analyzed by Kruskal-Wallis to meet statistical model assumptions. Genes that showed significant diet differences ( $P < 0.05$ ) were further analyzed by Tukey's post-hoc test (ANOVA) or Dunn's multiple comparisons test (K-W). Diets not sharing the letters "a" and "b" are significantly different ( $P_{adj} < 0.05$ ). Values are mean  $\pm$  s.d.



**Table S4. Diet-specific effects on cartilage protein abundance**

| Name                                                                                  | Abbreviation | LFLS         | LFHS        | HFLS         | P-value |
|---------------------------------------------------------------------------------------|--------------|--------------|-------------|--------------|---------|
| ATP-binding cassette, sub-family D (ALD), member 3                                    | ABCD3        | 1.43±0.53b   | 0.87±0.26a  | 1.15±0.33a,b | 0.0458  |
| acetyl-Coenzyme A acyltransferase 1A_B                                                | ACAA1A_B     | 1.26±0.3     | 0.85±0.28   | 1.21±0.37    | NS      |
| acetyl-Coenzyme A acyltransferase 2 (mitochondrial 3-oxoacyl-Coenzyme A thiolase)     | ACAA2        | 0.84±0.15b   | 0.9±0.14b   | 1.12±0.17a   | 0.0069  |
| acyl-Coenzyme A dehydrogenase, long-chain                                             | ACADL        | 1.19±0.26    | 0.92±0.2    | 1.17±0.28    | NS      |
| acyl-Coenzyme A dehydrogenase, medium chain                                           | ACADM        | 1.49±0.53    | 0.98±0.32   | 1.21±0.18    | NS      |
| acyl-Coenzyme A dehydrogenase, short chain                                            | ACADS        | 0.78±0.37    | 0.82±0.31   | 1.05±0.41    | NS      |
| acyl-Coenzyme A dehydrogenase, very long chain                                        | ACADVL       | 0.87±0.11    | 0.9±0.18    | 1.03±0.12    | NS      |
| aconitase 2, mitochondrial                                                            | ACO2         | 1.45±0.31b   | 1.06±0.36a  | 1.03±0.2a    | 0.0241  |
| acyl-CoA synthetase long-chain family member 1                                        | ACSL1        | 1.07±0.36    | 0.94±0.23   | 1.03±0.23    | NS      |
| aldo-keto reductase family 1, member B3 (aldose reductase)                            | AKR1B1       | 0.7±0.29b    | 1.12±0.24a  | 1±0.23a,b    | 0.0179  |
| albumin_murine                                                                        | ALB_M        | 1.82±0.5b    | 0.93±0.4a   | 1.32±0.5a,b  | 0.0073  |
| aldehyde dehydrogenase 2, mitochondrial                                               | ALDH2        | 1.46±0.43b   | 0.92±0.27a  | 1.17±0.2a,b  | 0.0164  |
| aldolase A, fructose-bisphosphate                                                     | ALDOA        | 1.24±0.44    | 1.24±0.4    | 0.87±0.18    | NS      |
| ATPase, Ca <sup>++</sup> transporting, cardiac muscle, fast twitch 1                  | ATP2A1       | 1.44±1.36    | 1.84±1.35   | 0.87±0.58    | NS      |
| ATPase, Ca <sup>++</sup> transporting, cardiac muscle, slow twitch 2                  | ATP2A2       | 1.09±0.46    | 1.44±0.81   | 0.87±0.31    | NS      |
| ATP synthase, H <sup>+</sup> transporting, mitochondrial F1 complex, alpha subunit 1  | ATP5A1       | 0.69±0.19b   | 1.26±0.41a  | 0.98±0.09a,b | 0.0029  |
| ATP synthase, H <sup>+</sup> transporting mitochondrial F1 complex, beta subunit      | ATP5B        | 0.64±0.15b   | 1.18±0.43a  | 0.98±0.16a,b | 0.0057  |
| 3-hydroxybutyrate dehydrogenase, type 1                                               | BDH1         | 1.41±0.78    | 1.04±0.35   | 0.9±0.17     | NS      |
| calreticulin                                                                          | CALR         | 1.05±0.38    | 0.85±0.18   | 1.09±0.12    | NS      |
| catalase                                                                              | CAT          | 1.24±0.41b   | 0.78±0.3a   | 1.2±0.27a,b  | 0.03    |
| CD36 antigen                                                                          | CD36         | 1.8±1.02     | 0.94±0.4    | 1.55±1.24    | NS      |
| creatine kinase, muscle                                                               | CKM          | 1.16±0.47    | 1.33±0.55   | 0.82±0.3     | NS      |
| creatine kinase, mitochondrial 2                                                      | CKMT2        | 1.23±0.76    | 1.22±0.49   | 0.99±0.3     | NS      |
| carnitine palmitoyltransferase 1b, muscle                                             | CPT1B        | 1.28±0.67    | 1.23±0.57   | 0.94±0.3     | NS      |
| carnitine palmitoyltransferase 2                                                      | CPT2         | 0.92±0.36    | 0.84±0.24   | 1.18±0.22    | NS      |
| carnitine acetyltransferase                                                           | CRAT         | 1.13±0.51    | 0.99±0.29   | 0.95±0.29    | NS      |
| crystallin, alpha B                                                                   | CRYAB        | 1.98±1.26    | 1.55±0.81   | 1.14±0.61    | NS      |
| citrate synthase                                                                      | CS           | 1.07±0.27    | 1.02±0.18   | 1.04±0.1     | NS      |
| 2,4-dienoyl CoA reductase 1, mitochondrial                                            | DECR1        | 0.89±0.16    | 1.11±0.26   | 1.11±0.27    | NS      |
| dihydrolipoamide S-acetyltransferase (E2 component of pyruvate dehydrogenase complex) | DLAT         | 0.8±0.15     | 1.09±0.35   | 0.97±0.19    | NS      |
| dihydrolipoamide dehydrogenase                                                        | DLD          | 1.28±0.2b    | 1.1±0.22a,b | 1±0.14a      | 0.0341  |
| dihydrolipoamide S-succinyltransferase (E2 component of 2-oxo-glutarate complex)      | DLST         | 0.79±0.18    | 0.97±0.25   | 1.02±0.13    | NS      |
| enoyl coenzyme A hydratase 1, peroxisomal                                             | ECH1         | 1.02±0.28a,b | 0.8±0.17b   | 1.28±0.24a   | 0.0041  |

|                                                                                                                                       |         |              |              |              |        |
|---------------------------------------------------------------------------------------------------------------------------------------|---------|--------------|--------------|--------------|--------|
| enoyl Coenzyme A hydratase, short chain, 1, mitochondrial                                                                             | ECHS1   | 0.99±0.16    | 0.98±0.11    | 1±0.14       | NS     |
| enoyl-Coenzyme A delta isomerase 1                                                                                                    | ECI1    | 0.69±0.18b   | 1.17±0.27a   | 0.96±0.2a,b  | 0.0021 |
| enoyl-Coenzyme A delta isomerase 2                                                                                                    | ECI2    | 0.71±0.16b   | 0.86±0.22a,b | 1.12±0.3a    | 0.012  |
| enolase 1, alpha non-neuron                                                                                                           | ENO1    | 1.07±0.25a,b | 0.86±0.18b   | 1.14±0.16a   | 0.0478 |
| enolase 3, beta muscle                                                                                                                | ENO3    | 1.65±0.81    | 1.54±0.69    | 0.82±0.4     | NS     |
| electron transferring flavoprotein, alpha polypeptide                                                                                 | ETFA    | 1.05±0.21    | 1.04±0.14    | 1.07±0.25    | NS     |
| electron transferring flavoprotein, beta polypeptide                                                                                  | ETFB    | 0.98±0.55    | 1.3±0.82     | 1.05±0.33    | NS     |
| electron transferring flavoprotein, dehydrogenase                                                                                     | ETFDH   | 1.02±0.3     | 0.95±0.26    | 1.01±0.15    | NS     |
| fatty acid binding protein 4, adipocyte                                                                                               | FABP4   | 1.14±0.58    | 0.94±0.29    | 1.11±0.35    | NS     |
| fumarate hydratase 1                                                                                                                  | FH1     | 1.47±0.36b   | 1.01±0.24a   | 1.13±0.34a,b | 0.037  |
| glyceraldehyde-3-phosphate dehydrogenase                                                                                              | GAPDH   | 1.1±0.2      | 1.09±0.23    | 0.91±0.12    | NS     |
| glutamate dehydrogenase 1                                                                                                             | GLUD1   | 1.41±0.41    | 0.99±0.31    | 1.25±0.55    | NS     |
| glutamic-oxaloacetic transaminase 1, soluble                                                                                          | GOT1    | 1.28±0.43    | 1.24±0.39    | 0.91±0.12    | NS     |
| glutamic-oxaloacetic transaminase 2, mitochondrial                                                                                    | GOT2    | 1.16±0.32    | 0.98±0.26    | 1±0.13       | NS     |
| glutathione peroxidase 1                                                                                                              | GPX1    | 1.39±0.28a   | 0.82±0.26b   | 1.29±0.29a   | 0.002  |
| glutathione peroxidase 4                                                                                                              | GPX4    | 1.5±0.43     | 1.03±0.41    | 1.07±0.3     | NS     |
| glutathione reductase                                                                                                                 | GSR     | 1.14±0.43    | 0.9±0.18     | 1.13±0.25    | NS     |
| glutathione S-transferase, mu 1                                                                                                       | GSTM1   | 0.94±0.11    | 1.03±0.27    | 1.06±0.23    | NS     |
| glutathione S-transferase, pi 1                                                                                                       | GSTP1   | 0.98±0.34    | 1.06±0.3     | 1.05±0.37    | NS     |
| hydroxyacyl-Coenzyme A dehydrogenase                                                                                                  | HADH    | 0.94±0.27    | 1.03±0.2     | 1.15±0.25    | NS     |
| hydroxyacyl-Coenzyme A dehydrogenase/3-ketoacyl-Coenzyme A thiolase/enoyl-Coenzyme A hydratase (trifunctional protein), alpha subunit | HADHA   | 1.35±0.33a   | 0.87±0.27b   | 1.24±0.18a   | 0.008  |
| hydroxyacyl-Coenzyme A dehydrogenase/3-ketoacyl-Coenzyme A thiolase/enoyl-Coenzyme A hydratase (trifunctional protein), beta subunit  | HADHB   | 0.83±0.17    | 0.93±0.13    | 1.05±0.17    | NS     |
| hexokinase 1                                                                                                                          | HK1     | 1.35±0.37    | 0.93±0.28    | 1.15±0.31    | NS     |
| hydroxysteroid (17-beta) dehydrogenase 4                                                                                              | HSD17B4 | 0.97±0.28    | 0.87±0.15    | 1.1±0.19     | NS     |
| heat shock protein 90, beta (Grp94), member 1                                                                                         | HSP90B1 | 1.4±0.62     | 0.88±0.21    | 1.24±0.41    | NS     |
| heat shock protein 1A                                                                                                                 | HSPA1A  | 1.27±0.47    | 0.88±0.21    | 1.13±0.1     | NS     |
| heat shock protein 5                                                                                                                  | HSPA5   | 1.16±0.33    | 0.85±0.26    | 1.09±0.38    | NS     |
| heat shock protein 9                                                                                                                  | HSPA9   | 1.32±0.49    | 0.89±0.25    | 1.19±0.19    | NS     |
| isocitrate dehydrogenase 1 (NADP+), soluble                                                                                           | IDH1    | 1.09±0.28    | 0.89±0.28    | 1.22±0.2     | NS     |
| isocitrate dehydrogenase 2 (NADP+), mitochondrial                                                                                     | IDH2    | 1.19±0.26    | 0.93±0.3     | 1.16±0.17    | NS     |
| isocitrate dehydrogenase 3 (NAD+) alpha                                                                                               | IDH3A   | 1.32±0.52    | 1.13±0.39    | 1.04±0.2     | NS     |
| isocitrate dehydrogenase 3 (NAD+) beta                                                                                                | IDH3B   | 0.78±0.38b   | 1.33±0.44a   | 0.92±0.18a,b | 0.0202 |
| isocitrate dehydrogenase 3 (NAD+), gamma                                                                                              | IDH3G   | 1.18±0.43    | 1.05±0.24    | 1±0.14       | NS     |
| lactate dehydrogenase A                                                                                                               | LDHA    | 0.8±0.27     | 1.13±0.3     | 0.99±0.28    | NS     |
| lactate dehydrogenase B                                                                                                               | LDHB    | 1.35±0.26b   | 0.98±0.16a   | 1.01±0.18a   | 0.0048 |
| lon peptidase 1, mitochondrial                                                                                                        | LONP1   | 1.42±0.36    | 1.02±0.34    | 1.21±0.37    | NS     |



|                                                                             |         |            |            |              |        |
|-----------------------------------------------------------------------------|---------|------------|------------|--------------|--------|
| malate dehydrogenase 2, NAD (mitochondrial)                                 | MDH2    | 0.92±0.24  | 1.01±0.21  | 0.93±0.15    | NS     |
| methionine sulfoxide reductase A                                            | MSRA    | 1.01±0.28  | 0.88±0.25  | 1.16±0.3     | NS     |
| NADH dehydrogenase (ubiquinone) Fe-S protein 1                              | NDUFS1  | 1.2±0.35   | 0.94±0.33  | 1.03±0.13    | NS     |
| NADH dehydrogenase (ubiquinone) flavoprotein 1                              | NDUFV1  | 1.09±0.24  | 1±0.37     | 0.94±0.25    | NS     |
| oxoglutarate (alpha-ketoglutarate) dehydrogenase (lipoamide)                | OGDH    | 1.28±0.34  | 0.97±0.27  | 1.09±0.19    | NS     |
| pyruvate carboxylase                                                        | PC      | 2.68±1.71b | 1.25±0.55a | 0.92±0.3a    | 0.0114 |
| pyruvate dehydrogenase E1 alpha 1                                           | PDHA1   | 1.33±0.41  | 1.1±0.34   | 1.02±0.17    | NS     |
| phosphofructokinase, liver, B-type                                          | PFKL    | 1.28±0.29a | 0.88±0.14b | 1.24±0.32a   | 0.0191 |
| phosphofructokinase, muscle                                                 | PFKM    | 1.36±0.76  | 1.6±0.9    | 0.87±0.39    | NS     |
| phosphoglycerate mutase 2                                                   | PGAM2   | 1.52±0.78  | 1.39±0.71  | 0.75±0.26    | NS     |
| phosphoglycerate kinase 1                                                   | PGK1    | 0.96±0.11  | 1.12±0.25  | 0.97±0.09    | NS     |
| pyruvate kinase, muscle 2                                                   | PKM2    | 1.17±0.08  | 1.06±0.3   | 0.97±0.14    | NS     |
| peroxiredoxin 1                                                             | PRDX1   | 1.53±0.4b  | 0.91±0.24a | 1.24±0.29a,b | 0.0052 |
| peroxiredoxin 2                                                             | PRDX2   | 2.02±0.85b | 0.89±0.23a | 1.46±0.5a,b  | 0.0063 |
| peroxiredoxin 3                                                             | PRDX3   | 1.02±0.26  | 1.03±0.31  | 1.03±0.18    | NS     |
| peroxiredoxin 5                                                             | PRDX5   | 0.83±0.19  | 0.98±0.36  | 1.26±0.69    | NS     |
| peroxiredoxin 6                                                             | PRDX6   | 1.11±0.14  | 0.92±0.13  | 1.18±0.27    | NS     |
| protein kinase, cAMP dependent, catalytic, alpha                            | PRKACA  | 1.24±0.29  | 0.96±0.22  | 1.23±0.24    | NS     |
| brain glycogen phosphorylase                                                | PYGB    | 1.69±0.55b | 0.98±0.4a  | 1.17±0.24a,b | 0.0123 |
| muscle glycogen phosphorylase                                               | PYGM    | 1.49±1.11  | 1.82±1.37  | 1.03±0.78    | NS     |
| succinate dehydrogenase complex, subunit A, flavoprotein (Fp)               | SDHA    | 1.3±0.38   | 1.01±0.24  | 1.06±0.19    | NS     |
| succinate dehydrogenase complex, subunit B, iron sulfur (Ip)                | SDHB    | 1.21±0.37  | 1.01±0.32  | 1.12±0.26    | NS     |
| solute carrier family 25 (mitochondrial carrier, citrate carrier), member 1 | SLC25A1 | 0.84±0.56  | 1.63±1.41  | 0.86±0.29    | NS     |
| superoxide dismutase 1, soluble                                             | SOD1    | 1.35±0.37b | 0.86±0.21a | 1.09±0.31a,b | 0.0253 |
| superoxide dismutase 2, mitochondrial                                       | SOD2    | 1.5±0.26b  | 1±0.32a    | 1.02±0.2a    | 0.0025 |
| succinate-Coenzyme A ligase, ADP-forming, beta subunit                      | SUCLA2  | 0.76±0.35  | 1.07±0.29  | 0.93±0.17    | NS     |
| transaldolase 1                                                             | TALDO1  | 1.13±0.39  | 0.85±0.32  | 1.11±0.37    | NS     |
| transketolase                                                               | TKT     | 1.14±0.45  | 0.89±0.2   | 1.11±0.19    | NS     |
| triosephosphate isomerase 1                                                 | TPI     | 1.13±0.29  | 1.17±0.37  | 0.92±0.17    | NS     |
| thioredoxin 1                                                               | TXN1    | 1.1±0.23   | 0.93±0.26  | 1.05±0.27    | NS     |
| thioredoxin reductase 1                                                     | TXNRD1  | 1.22±0.35b | 0.86±0.19a | 1.13±0.17a,b | 0.0356 |
| ubiquinol-cytochrome c reductase core protein 1                             | UQCRC1  | 0.98±0.15  | 1.02±0.21  | 1.02±0.16    | NS     |

Protein data obtained by selected reaction monitoring (SRM) mass spectrometry. Values were normalized to a BSA internal standard and cellular reference protein MDH1. Samples were analyzed in two separate runs (Run 1: LFHS (n=3) and HFLS (n=5); Run 2: LFLS (n=8), LFHS (n=5), HFLS (n=3)), and data were normalized to the median response of LFHS and HFLS samples for each run. The integrated data were used for statistical comparison among the three diet groups (n=8 per diet) by one-way ANOVA. The enzymes that showed significant differences ( $P<0.05$ ) were analyzed by Tukey post-hoc test. Diets not sharing the letters "a" and "b" are significantly different ( $P\text{-adj}<0.05$ ). Values are mean±s.d.

**Table S5. Control and high fat diet compositions in obese rodent models of idiopathic OA**

| Species (Sex)             | Control Diet Composition                                                                                                         | High Fat Diet Composition                                                                                                       | Matched Diets? | Age begin diet & diet duration | OA phenotype(s)                                                                | Ref. |
|---------------------------|----------------------------------------------------------------------------------------------------------------------------------|---------------------------------------------------------------------------------------------------------------------------------|----------------|--------------------------------|--------------------------------------------------------------------------------|------|
| Rat (M)                   | Lab Diet 5001<br>CHO (57.9 %kcal)<br>Sucrose (3.2%), Starch (22%)<br>Fat (13.4 %kcal)<br>Lard, fish meal                         | #102412, Dyets Inc.<br>CHO (45 %kcal)<br>Sucrose (100%)<br>Fat (40 %kcal)<br>Lard, soybean oil                                  | No             | 8-12 weeks,<br>28 weeks        | Cartilage pathology, synovial fluid inflammation                               | 1    |
| Rat (M)                   | NIH-31<br>CHO (~74 %kcal)<br>N/A<br>Fat (~9 %kcal)<br>Fish meal, soybean oil                                                     | NIH-31 (adult-onset obesity)<br>CHO (~74 %kcal)<br>N/A<br>Fat (~9 %kcal)<br>Fish meal, soybean oil                              | Yes            | Weaning,<br>30 months          | Cartilage and meniscus pathology, synovial thickening                          | 2    |
| Rat (M)                   | Custom<br>CHO (N/A)<br>Starch (57%)<br>Fat (N/A)                                                                                 | Custom<br>CHO (N/A)<br>Fructose, sweetened condensed milk<br>Fat (N/A)<br>Beef tallow (20%)                                     | No             | 9-10 weeks,<br>16 weeks        | Cartilage pathology, reduced sub-chondral bone fraction, synovial inflammation | 3,4  |
| Mouse (F)                 | #D12450B, Research Diets Inc<br>CHO (70 %kcal)<br>Sucrose (33%), Starch (30%)<br>Fat (10 %kcal)<br>Lard (2%), soybean oil (2.4%) | #D12451, Research Diets Inc<br>CHO (35 %kcal)<br>Sucrose (20%), Starch (8%)<br>Fat (45 %kcal)<br>Lard (21%), soybean oil (3%)   | Yes            | 9 weeks,<br>45 weeks           | Cartilage pathology                                                            | 5    |
| Mouse (M)                 | #CE-2, CLEA Japan Inc<br>CHO (58 %kcal)<br>N/A<br>Fat (12 %kcal)<br>Cereal germ, soybean oil                                     | #HFD32, CLEA Japan Inc<br>CHO (23 %kcal)<br>Sucrose (7%)<br>Fat (57 %kcal)<br>Beef tallow (16%), safflower oil (20%)            | No             | 7 weeks,<br>12 weeks           | Cartilage pathology, osteophytes, synovial thickening                          | 6    |
| Mouse (M)                 | #D12450B, Research Diets Inc<br>CHO (70 %kcal)<br>Sucrose (33%), Starch (30%)<br>Fat (10 %kcal)<br>Lard (2%), soybean oil (2.4%) | #D12492, Research Diets Inc<br>CHO (20 %kcal)<br>Sucrose (9%), Starch (0%)<br>Fat (60 %kcal)<br>Lard (32%), soybean oil (3%)    | Yes            | 5 weeks,<br>24 weeks           | Osteophytes, synovial inflammation                                             | 7    |
| Mouse (M)                 | #D12450B, Research Diets Inc<br>CHO (70 %kcal)<br>Sucrose (33%), Starch (30%)<br>Fat (10 %kcal)<br>Lard (2%), soybean oil (2.4%) | #D12492, Research Diets Inc<br>CHO (20 %kcal)<br>Sucrose (9%), Starch (0%)<br>Fat (60 %kcal)<br>Lard (32%), soybean oil (3%)    | Yes            | 6 weeks,<br>20-46 weeks        | Osteophytes (20 weeks), cartilage pathology (46 weeks)                         | 8    |
| Mouse (M)                 | Rodent Chow 5001, Purina Inc<br>CHO (~60 %kcal)<br>Sucrose (3.7%), Starch (32%)<br>Fat (13.5 %kcal)<br>Lard, fish meal           | #D12492, Research Diets Inc<br>CHO (20 %kcal)<br>Sucrose (9%), Starch (0%)<br>Fat (60 %kcal)<br>Lard (32%), soybean oil (3%)    | No             | 12 weeks,<br>12 weeks          | Cartilage pathology, increased sub-chondral bone thickness                     | 9    |
| Mouse (M)                 | #V1534 Chow, Ssniff GmbH<br>CHO (67 %kcal)<br>Sucrose (5.4%), Starch (36%)<br>Fat (9 %kcal)<br>N/A                               | #D12451, Ssniff Spezialdiäten<br>CHO (35 %kcal)<br>Sucrose (20%), Starch (8%)<br>Fat (45 %kcal)<br>Lard (21%), soybean oil (3%) | No             | 12 weeks,<br>24 weeks          | Osteophytes (variable), synovial inflammation (variable)                       | 10   |
| Mouse, Human CRP Tg (M/F) | #V1534 Chow, Ssniff GmbH<br>CHO (67 %kcal)<br>Sucrose (5.4%), Starch (36%)<br>Fat (9 %kcal)<br>N/A                               | #D12451, Ssniff Spezialdiäten<br>CHO (35 %kcal)<br>Sucrose (20%), Starch (8%)<br>Fat (45 %kcal)<br>Lard (21%), soybean oil (3%) | No             | 12-16 weeks,<br>38 weeks       | Cartilage pathology (male only)                                                | 11   |

M = male; F = female. CHO = carbohydrate. Diet compositions based on online diet data sheets obtained in March 2018; potential changes from time of study completion were not evaluated. Unless specified, % is by weight.

## Table S5 References

1. Collins KH, Paul HA, Reimer RA, Seerattan RA, Hart DA, Herzog W. Relationship between inflammation, the gut microbiota, and metabolic osteoarthritis development: studies in a rat model. *Osteoarthritis Cartilage*. 2015;23(11):1989-1998. doi:10.1016/j.joca.2015.03.014.
2. Fu Y, Kinter M, Hudson J, et al. Aging Promotes Sirtuin 3–Dependent Cartilage Superoxide Dismutase 2 Acetylation and Osteoarthritis. *Arthritis Rheumatol*. 2016;68(8):1887-1898. doi:10.1002/art.39618.
3. Sekar S, Shafie SR, Prasadam I, et al. Saturated fatty acids induce development of both metabolic syndrome and osteoarthritis in rats. *Sci Rep*. 2017;7:46457. doi:10.1038/srep46457.
4. Sun AR, Panchal SK, Friis T, et al. Obesity-associated metabolic syndrome spontaneously induces infiltration of pro-inflammatory macrophage in synovium and promotes osteoarthritis. *PLoS ONE*. 2017;12(8):e0183693. doi:10.1371/journal.pone.0183693.
5. Griffin TM, Fermor B, Huebner JL, et al. Diet-induced obesity differentially regulates behavioral, biomechanical, and molecular risk factors for osteoarthritis in mice. *Arthritis Res Ther*. 2010;12(4):R130. doi:10.1186/ar3068.
6. Aibibula Z, Ailixiding M, Iwata M, et al. Xanthine oxidoreductase activation is implicated in the onset of metabolic arthritis. *Biochemical and Biophysical Research Communications*. 2016;472(1):26-32. doi:10.1016/j.bbrc.2016.02.039.
7. Hamada D, Maynard R, Schott E, et al. Suppressive Effects of Insulin on Tumor Necrosis Factor–Dependent Early Osteoarthritic Changes Associated With Obesity and Type 2 Diabetes Mellitus. *Arthritis Rheumatol*. 2016;68(6):1392-1402. doi:10.1002/art.39561.
8. Barboza E, Hudson J, Chang W-P, et al. Profibrotic Infrapatellar Fat Pad Remodeling Without M1 Macrophage Polarization Precedes Knee Osteoarthritis in Mice With Diet-Induced Obesity. *Arthritis Rheumatol*. 2017;69(6):1221-1232. doi:10.1002/art.40056.
9. Griffin TM, Huebner JL, Kraus VB, Yan Z, Guilak F. Induction of osteoarthritis and metabolic inflammation by a very high-fat diet in mice: Effects of short-term exercise. *Arthritis Rheum*. 2012;64(2):443-453. doi:10.1002/art.33332.
10. Kozijn AE, Gierman LM, van der Ham F, et al. Variable cartilage degradation in mice with diet-induced metabolic dysfunction: food for thought. *Osteoarthritis Cartilage*. November 2017:1-13. doi:10.1016/j.joca.2017.10.010.
11. Gierman LM, van der Ham F, Koudijs A, et al. Metabolic stress-induced inflammation plays a major role in the development of osteoarthritis in mice. *Arthritis Rheum*. 2012;64(4):1172-1181. doi:10.1002/art.33443.
